# Supplementary material
Source: PubMed Central journal article supplement (PMC384690)

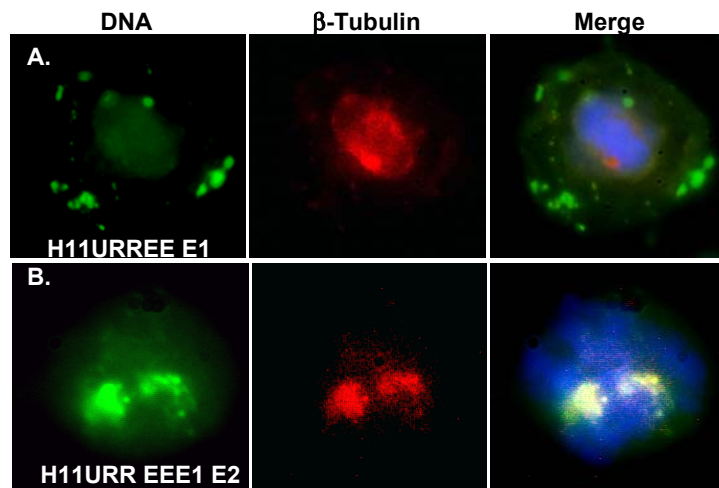

Supplement: pnas_101_12_4030__3.pdf [file pnas_101_12_4030__3.pdf]
